# Supplementary material for: Alterations in glycolytic/cholesterogenic gene expression in hepatocellular carcinoma
Source: PubMed Central journal article supplement (PMC7346031; doi:10.18632/aging.103254), 2020-06-01
Supplement: aging-12-103254-s003..pdf [file aging-12-103254-s003..pdf]

## SUPPLEMENTARY TABLES

**Supplementary Table 1. Extent of various LIHC subtypes and metabolic phenotypes in each sample.**

| Row Labels      | Count of Hoshiba_groups | Count of Budhu_groups | Count of Chew_groups |
|-----------------|-------------------------|-----------------------|----------------------|
| Cholesterogenic | 132                     | 132                   | 132                  |
| Glycolytic      | 146                     | 146                   | 146                  |
| Mixed           | 167                     | 167                   | 167                  |
| Quiescent       | 163                     | 163                   | 163                  |
| Grand Total     | 608                     | 608                   | 608                  |

  

| Count of Chew_groups | Column Labels | Count of Chew_groups | Column Labels |
|----------------------|---------------|----------------------|---------------|
| Row Labels           | Good          | Poor                 | Grand Total   |
| Cholesterogenic      | 37            | 95                   | 132           |
| Glycolytic           | 81            | 65                   | 146           |
| Mixed                | 73            | 94                   | 167           |
| Quiescent            | 61            | 102                  | 163           |
| Grand Total          | 252           | 356                  | 608           |

  

| Count of Budhu_groups | Column Labels | Count of Budhu_groups | Column Labels |
|-----------------------|---------------|-----------------------|---------------|
| Row Labels            | Mam           | Mim                   | Grand Total   |
| Cholesterogenic       | 34            | 98                    | 132           |
| Glycolytic            | 52            | 94                    | 146           |
| Mixed                 | 29            | 138                   | 167           |
| Quiescent             | 40            | 123                   | 163           |
| Grand Total           | 155           | 453                   | 608           |

  

| Count of Hoshiba_groups | Column Labels | Count of Hoshiba_groups | Column Labels |
|-------------------------|---------------|-------------------------|---------------|
| Row Labels              | Good          | Poor                    | Grand Total   |
| Cholesterogenic         | 46            | 86                      | 132           |
| Glycolytic              | 65            | 81                      | 146           |
| Mixed                   | 50            | 117                     | 167           |
| Quiescent               | 85            | 78                      | 163           |
| Grand Total             | 246           | 362                     | 608           |

  

| Row Labels      | Good        | Poor       | <i>p</i> value |
|-----------------|-------------|------------|----------------|
| Cholesterogenic | 28.03030303 | 71.969697  | 0.22701108     |
| Glycolytic      | 55.47945205 | 44.520548  | 0.0156542      |
| Mixed           | 43.71257485 | 56.2874252 | 0.38750472     |
| Quiescent       | 37.42331288 | 62.5766871 |                |

  

| Row Labels      | Mam         | Mim        | <i>p</i> value |
|-----------------|-------------|------------|----------------|
| Cholesterogenic | 25.75757576 | 74.2424242 | 1              |
| Glycolytic      | 35.61643836 | 64.3835616 | 0.12422132     |
| Mixed           | 17.36526946 | 82.6347305 | 0.22402215     |
| Quiescent       | 24.5398773  | 75.4601227 |                |

  

| Row Labels      | Good        | Poor       | <i>p</i> value |
|-----------------|-------------|------------|----------------|
| Cholesterogenic | 34.84848485 | 65.1515152 | 0.02223115     |
| Glycolytic      | 44.52054795 | 55.4794521 | 0.39599375     |
| Mixed           | 29.94011976 | 70.0598802 | 0.00243795     |
| Quiescent       | 52.14723926 | 47.8527607 |                |

Please browse Full Text version to see the data of Supplementary Table 2.

**Supplementary Table 2. Consistent cluster analysis of glycolytic and cholesterogenic gene expression in 26 cancer types (tumor content  $\geq 30\%$ ).**
