# Supplementary material for: Alterations in glycolytic/cholesterogenic gene expression in hepatocellular carcinoma
Source: publisher site journal article supplement (doi:10.18632/aging.103254), 2020-06-01
Supplement: Supplementary file [file aging-v12i11-103254-supplementary-material-SD1.pdf]

**SUPPLEMENTARY FIGURE**

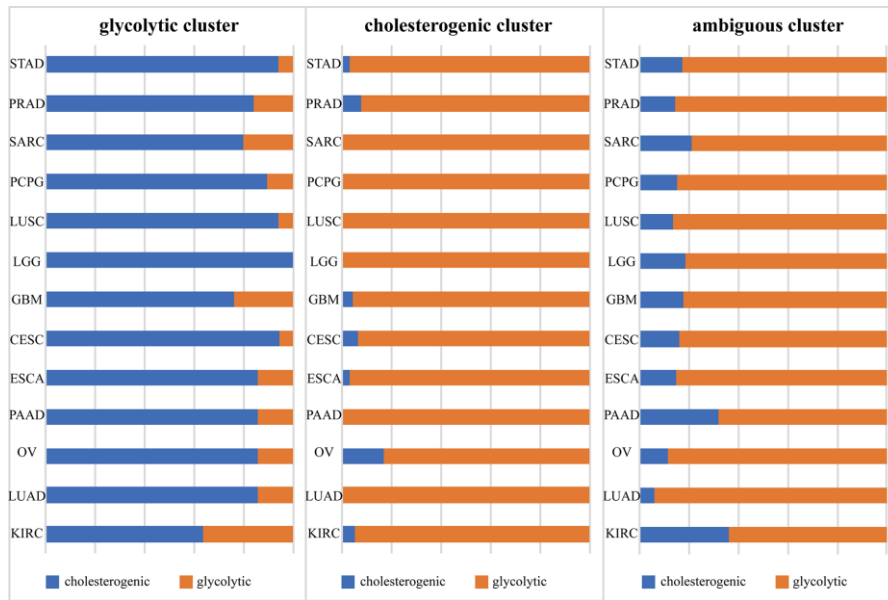

**Supplementary Figure 1. Glycolysis- and cholesterol-related core gene clusters in 13 cancer types.**
