# Supplementary material for: Alterations in glycolytic/cholesterogenic gene expression in hepatocellular carcinoma
Source: Aging (Albany NY). 2020 Jun 1;12(11):10300–16. doi: 10.18632/aging.103254 (PMC7346031; doi:10.18632/aging.103254)
Supplement: Supplementary Table 2 [file aging-12-103254-s001..xlsx]

## Sheet: Supplementary Table 2
Cancer type	cholesterogenic	glycologenic	amb	group1 cholesterogenic	group1 glycologenic	group1 cholesterogenic number	group1 glycolytic number	group2 cholesterogenic	group2 glycolytic	group2 cholesterogenic number	group2 glycolytic number	group3 cholesterogenic	group3 glycolytic	group3 cholesterogenic number	group3 glycolytic number	group4 cholesterogenic	group4 glycolytic	group4 cholesterogenic number	group4 glycolytic number	group5 cholesterogenic	group5 glycolytic	group5 cholesterogenic number	group5 glycolytic number
BLCA	-	-	-	0	1	0	13	0.108696	0.891304	5	41	0.294118	0.705882	5	12	1	0	10	0	0.5	0.5	5	5
BRCA	-	-	-	0.166667	0.833333	1	5	0.181818	0.818182	4	18	0.666667	0.333333	10	5	0.357143	0.642857	10	18	0	1	0	25
CESC	5	1	2,3,4	0.0625	0.9375	1	15	0.25	0.75	5	15	0.027027	0.972973	1	36	0.2	0.8	1	4	0.944444	0.0555556	17	1
COAD	-	-	-	0.291667	0.708333	7	17	0.176471	0.823529	3	14	0.08	0.92	2	23	0.105263	0.894737	2	17	1	0	11	0
ESCA	4	3	1,2,5	0.0588235	0.941176	1	16	0.266667	0.733333	4	11	0.0294118	0.970588	1	33	0.857143	0.142857	18	3	0.111111	0.888889	1	8
GBM	5	1	2,3,4	0.0434783	0.956522	1	22	0.2	0.8	3	12	0.285714	0.714286	4	10	0.0434783	0.956522	1	22	0.761905	0.238095	16	5
HNSC	-	-	-	0.0588235	0.941176	1	16	0.0930233	0.906977	4	39	0.55	0.45	11	9	0.25	0.75	1	3	0.666667	0.333333	8	4
KIRC	2	1	5,3,4	0.05	0.95	1	19	0.636364	0.363636	14	8	0.235294	0.764706	4	13	0.0909091	0.909091	3	30	0.75	0.25	3	1
KIRP	-	-	-	0	1	0	10	0.128205	0.871795	5	34	0.352941	0.647059	6	11	0	1	0	5	0.56	0.44	14	11
LAML	-	-	-	0.307692	0.692308	12	27	0.323529	0.676471	11	23	0.0625	0.9375	1	15	0	1	0	5	0.5	0.5	1	1
LGG	5	1	2,3,4	0	1	0	21	0.0625	0.9375	1	15	0.0606061	0.939394	2	31	0.428571	0.571429	3	4	1	0	19	0
LUAD	4	1	1,2,5	0	1	0	12	0.136364	0.863636	3	19	0.0384615	0.961538	1	25	0.84	0.16	21	4	0	1	0	11
LUSC	5	1	2,3,4	0	1	0	13	0.115385	0.884615	3	23	0.181818	0.818182	4	18	0.111111	0.888889	2	16	0.941176	0.0588235	16	1
OV	4	1	2,3,5	0.166667	0.833333	3	15	0.0555556	0.944444	1	17	0.166667	0.833333	2	10	0.727273	0.272727	16	6	0.115385	0.884615	3	23
PAAD	4	1	2,3,5	0	1	0	11	0.102041	0.897959	5	44	0.1	0.9	1	9	0.722222	0.277778	13	5	0.75	0.25	6	2
PCPG	5	1	2,3,4	0	1	0	14	0.294118	0.705882	5	12	0.1	0.9	1	9	0.0555556	0.944444	2	34	0.894737	0.105263	17	2
PRAD	5	2	1,3,4	0.333333	0.666667	5	10	0.0769231	0.923077	3	36	0	1	0	12	0.0909091	0.909091	1	10	0.842105	0.157895	16	3
READ	-	-	-	0.347826	0.652174	8	15	0.129032	0.870968	4	27	0.2	0.8	3	12	0.0555556	0.944444	1	17	1	0	9	0
SARC	5	1	2,3,4	0	1	0	18	0.137931	0.862069	4	25	0.142857	0.857143	2	12	0.35	0.65	7	13	0.8	0.2	12	3
SKCM	-	-	-	0.37931	0.62069	11	18	0.315789	0.684211	12	26	0	1	0	12	0	1	0	11	0.333333	0.666667	2	4
STAD	5	4	1,2,3	0.15	0.85	3	17	0.181818	0.818182	2	9	0.1875	0.8125	3	13	0.03125	0.96875	1	31	0.941176	0.0588235	16	1
TGCT	-	-	-	0.257143	0.742857	9	26	0.4	0.6	6	9	0.333333	0.666667	2	4	0.205882	0.794118	7	27	0.166667	0.833333	1	5
THCA	-	-	-	0.4375	0.5625	7	9	0.4	0.6	4	6	0.0909091	0.909091	1	10	0.217391	0.782609	5	18	0.222222	0.777778	8	28
THYM	-	-	-	0.4	0.6	6	9	0.117647	0.882353	2	15	0.125	0.875	2	14	0.285714	0.714286	10	25	0.384615	0.615385	5	8
UCEC	-	-	-	0.208333	0.791667	5	19	0.363636	0.636364	12	21	0.0833333	0.916667	1	11	0.157895	0.842105	3	16	0.5	0.5	4	4
